# Supplementary material for: Broad Surveys of DNA Viral Diversity Obtained through Viral Metagenomics of Mosquitoes
Source: PubMed Central journal article supplement (PMC3108952; doi:10.1371/journal.pone.0020579), 2011-06-06

Fig. S1. Locations of mosquito samples, produced using Google Earth (<http://earth.google.com/>). Samples were obtained from 3 sites in San Diego: Buena Vista Lagoon (SD-BVL), River Bank (SD-RB), Wild Animal Park (SD-WAP).

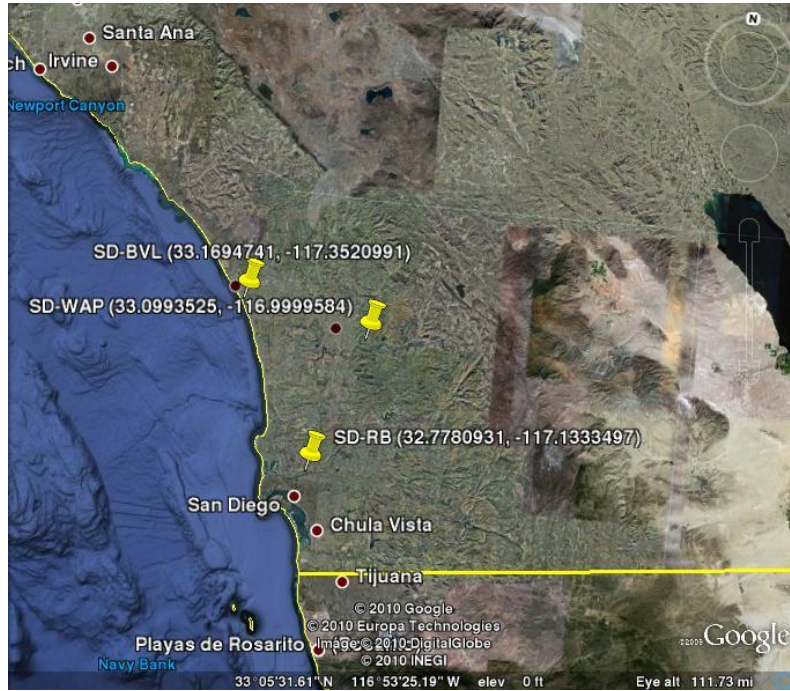

Supplement: pone.0020579.s001.pdf [file pone.0020579.s001.pdf]
