# Supplementary material for: Broad Surveys of DNA Viral Diversity Obtained through Viral Metagenomics of Mosquitoes
Source: PubMed Central journal article supplement (PMC3108952; doi:10.1371/journal.pone.0020579), 2011-06-06
Supplement: pone.0020579.s002.pdf [file pone.0020579.s002.pdf]

Table S1. Sample description.

| <b>Sample Name</b> | <b>Sampling Location (GPS)</b>                   | <b>Sampling Date</b> | <b>Sample composition</b>                        | <b>Sequencing Platform</b> | <b># of Reads</b> | <b>Average Read Length (bp)</b> | <b># of Bases</b> |
|--------------------|--------------------------------------------------|----------------------|--------------------------------------------------|----------------------------|-------------------|---------------------------------|-------------------|
| Mosquito SD-BVL    | Buena Vista Lagoon, SD, USA<br>(33.17N,-117.35W) | 01/25/06             | 80 female mixed species mosquitoes               | GS20                       | 340,098           | 102.61                          | 35 Mb             |
| Mosquito SD-RB     | River Bank, SD, USA<br>(32.78N, -117.13W)        | 06/06/06             | 200 female mixed species mosquitoes              | GS20                       | 615,576           | 104.16                          | 64 Mb             |
| Mosquito SD-WAP    | Wild Animal Park, SD, USA<br>(33.10N, -117.00W)  | 09/10/09             | 200 female <i>Culex erythrothorax</i> mosquitoes | GSFLX Titanium             | 259,591           | 398.78                          | 104 Mb            |
