# Supplementary material for: Broad Surveys of DNA Viral Diversity Obtained through Viral Metagenomics of Mosquitoes
Source: PubMed Central journal article supplement (PMC3108952; doi:10.1371/journal.pone.0020579), 2011-06-06
Supplement: pone.0020579.s003.pdf [file pone.0020579.s003.pdf]

Table S2. Contigs and genomes with significant tBLASTx similarities to known vertebrate and plant viruses. The virus name, family and host of the most significant tBLASTx sequence in Genbank are shown. Complete genomes are indicated with asterisks (\*). For PCR results, "Y" indicates that the contig was detected in that specific sample and "N" indicates that it was not.

| Genome / contig name                        | Contig length | Sample | PCR result using |               | Most significant matches from Genbank (tBLASTx, E-value < 0.001) |                   |                                                                       | % a.a. identity |
|---------------------------------------------|---------------|--------|------------------|---------------|------------------------------------------------------------------|-------------------|-----------------------------------------------------------------------|-----------------|
|                                             |               |        | Sample SD-BVL    | Sample SD-WAP | Family                                                           | Host              | Virus (E-value)                                                       |                 |
| Mosquito VEM Anellovirus - SDBVL A          | 2336*         | SD-BVL | Y                | N             | Anelloviridae                                                    | Primate           | Torque teno tupaia virus (2e-47)                                      | 40              |
| Mosquito VEM Anellovirus - SDBVL B          | 2335*         | SD-BVL | Y                | N             | Anelloviridae                                                    | Primate           | Torque teno tupaia virus (6e-46)                                      | 40              |
| Mosquito VEM Circovirus - SDBVL C & D       | 236 & 962     | SD-BVL | Y                | -             | Circoviridae                                                     | Bird              | Beak and feather disease virus (8e-008 & 9e-034)                      | 63 & 62         |
| Mosquito VEM Circovirus - SDBVL E           | 327           | SD-BVL | Y                | -             | Circoviridae                                                     | Bird              | Gull circovirus (2e-012)                                              | 49              |
| Mosquito VEM Geminivirus - SDBVL F          | 194           | SD-BVL | Y                | -             | Geminiviridae                                                    | Plant             | Maize streak virus(4e-005)                                            | 53              |
| Mosquito VEM Geminifungivirus - SDBVL G     | 2238*         | SD-BVL | Y                | N             | Unclassified recombinant virus                                   | Plant/<br>Fungi?  | Sclerotinia sclerotiorum hypovirulence associated DNA virus 1 (3e-76) | 62              |
| Mosquito VEM Anellovirus - SDRB A           | 2547*         | SD-RB  | N                | N             | Anelloviridae                                                    | Primate           | Torque teno douroucouli virus (2e-28)                                 | 43              |
| Mosquito VEM Anellovirus - SDRB B           | 2544*         | SD-RB  | N                | N             | Anelloviridae                                                    | Primate           | Torque teno douroucouli virus (2e-30)                                 | 48              |
| Mosquito VEM Anellovirus - SDRB C           | 500           | SD-RB  | -                | -             | Anelloviridae                                                    | Mammal            | Bovine Torque teno virus (3e-004 )                                    | 69              |
| Mosquito VEM Circovirus - SDRB D & E        | 699 & 183     | SD-RB  | -                | -             | Circoviridae                                                     | Bird              | Beak and feather disease virus (1e-014 & 8e-004 )                     | 50 & 52         |
| Mosquito VEM Circovirus - SDRB F - L        | 196-1626      | SD-RB  | -                | -             | Circoviridae                                                     | Bird              | Columbid circovirus (3e-004 - 8e-017)                                 | 41-66           |
| Mosquito VEM Circovirus - SDRB M            | 417           | SD-RB  | -                | -             | Circoviridae                                                     | Bird              | Goose circovirus (6e-05) (2nd best hit)                               | 51              |
| Mosquito VEM Circovirus - SDRB N & O        | 753 & 557     | SD-RB  | -                | -             | Circoviridae                                                     | Bird              | Gull circovirus (2e-008 & 2e-009)                                     | 47 & 52         |
| Mosquito VEM Circovirus - SDRB P            | 410           | SD-RB  | -                | -             | Circoviridae                                                     | Bird              | Muscovy duck circovirus (4e-004)                                      | 50              |
| Mosquito VEM Circovirus - SDRB Q & R        | 863 & 261     | SD-RB  | -                | -             | Circoviridae                                                     | Bird              | Raven circovirus (1e-007 - 8e-006)                                    | 34 - 43         |
| Mosquito VEM Circovirus - SDRB S & T        | 988 & 850     | SD-RB  | -                | -             | Circoviridae                                                     | Bird              | Duck circovirus (2e-11 & 7e-19 ) (2nd best hit)                       | 43              |
| Mosquito VEM Circovirus - SDRB U            | 463           | SD-RB  | -                | -             | Circoviridae                                                     | Bird              | Canary circovirus (8e-005)                                            | 61              |
| Mosquito VEM Circovirus - SDRB V & X        | 485 & 551     | SD-RB  | -                | -             | Circoviridae                                                     | Environmental     | Circovirus-like genome RW-C (1e-05)                                   | 41 - 45         |
| Mosquito VEM Geminivirus - SDRB AA          | 915           | SD-RB  | -                | -             | Geminiviridae                                                    | Plant             | Miscanthus streak virus (5e-014 )                                     | 46              |
| Mosquito VEM Herpesvirus - SDRB AB          | 184           | SD-RB  | -                | -             | Herpesviridae                                                    | Human             | Human herpesvirus 1 (2e-005)                                          | 70              |
| Mosquito VEM Herpesvirus - SDRB AC          | 742           | SD-RB  | -                | -             | Herpesviridae                                                    | Mammal            | Bovine herpesvirus (3e-04)                                            | 34              |
| Mosquito VEM Papillomavirus - SDRB AD       | Many          | SD-RB  | N                | N             | Papillomaviridae                                                 | Human             | Human papillomavirus type 23 (3e-117)                                 | ~100            |
| Mosquito VEM Papillomavirus - SDRB AE - AG  | 152 - 254     | SD-RB  | N                | N             | Papillomaviridae                                                 | Human             | Human papillomavirus type 112 (6e-19 - 5e-12)                         | 67-80           |
| Mosquito VEM Poxvirus - SDRB AH & AI        | 391 & 380     | SD-RB  | -                | -             | Poxviridae                                                       | Bird              | Canarypox virus (5e-07 & 2e-06 )                                      | 45 & 48         |
| Mosquito VEM CircoNanoGeminivirus - SDRB AJ | 2212*         | SD-RB  | N                | N             | Unclassified recombinant virus                                   | Animal/<br>Plant? | Muscovy duck circovirus (3e-25)                                       | 60              |
| Mosquito VEM Anellovirus - SDWAP A          | 1969          | SD-WAP | -                | -             | Anelloviridae                                                    | Human             | SEN virus (1e-05)                                                     | 32              |
| Mosquito VEM Anellovirus - SDWAP B          | 2594          | SD-WAP | Y                | Y             | Anelloviridae                                                    | Human             | Torque teno virus (8e-10)                                             | 36              |
| Mosquito VEM Anellovirus - SDWAP C - E      | 283 - 591     | SD-WAP | -                | -             | Anelloviridae                                                    | Human             | Torque teno virus (2e-04 - 2e-10)                                     | 44 - 48         |
| Mosquito VEM Circovirus - SDWAP F           | 429           | SD-WAP | -                | -             | Circoviridae                                                     | Mammal            | Cyclovirus Chimp11 (7e-08)                                            | 50              |
| Mosquito VEM Circovirus - SDWAP G           | 586           | SD-WAP | -                | -             | Circoviridae                                                     | Bird              | Beak and feather disease virus (9e-10)                                | 61              |
| Mosquito VEM Circovirus - SDWAP H & I       | 695 & 1980    | SD-WAP | -                | -             | Circoviridae                                                     | Bird              | Gull circovirus (1e-17 & 2e-26)                                       | 43 & 53         |
| Mosquito VEM Circovirus - SDWAP J           | 2778          | SD-WAP | -                | -             | Circoviridae                                                     | Bird              | Raven circovirus (8e-18) (2nd best hit)                               | 68              |
| Mosquito VEM Circovirus - SDWAP K           | 942           | SD-WAP | -                | -             | Circoviridae                                                     | Mammal            | Cyclovirus NG14, complete genome (3e-06)                              | 56              |
| Mosquito VEM Circovirus - SDWAP L           | 1998          | SD-WAP | -                | -             | Circoviridae                                                     | Environmental     | Circovirus-like genome RW-E (2e-79)                                   | 65              |
| Mosquito VEM Circovirus - SDWAP M           | 1354          | SD-WAP | -                | -             | Circoviridae                                                     | Environmental     | Circovirus-like genome CB-A (2e-07)                                   | 37              |
| Mosquito VEM Circovirus - SDWAP N           | 875           | SD-WAP | -                | -             | Circoviridae                                                     | Environmental     | Cyclovirus PK5006 (2e-26) (2nd best hit)                              | 50              |
| Mosquito VEM Nanovirus - SDWAP O            | 1151          | SD-WAP | -                | -             | Nanoviridae                                                      | Plant             | Banana bunchy top virus (5e-10)                                       | 53              |
| Mosquito VEM Nanovirus - SDWAP P            | 1265          | SD-WAP | -                | -             | Nanoviridae                                                      | Plant             | Milk vetch dwarf virus (1e-09)                                        | 53              |
| Mosquito VEM Nanovirus - SDWAP Q            | 510           | SD-WAP | -                | -             | Nanoviridae                                                      | Plant             | Coconut foliar decay virus (2e-09)                                    | 51              |
| Mosquito VEM Geminivirus - SDWAP R          | 807           | SD-WAP | -                | -             | Geminiviridae                                                    | Plant             | Ageratum yellow vein virus (3e-09)                                    | 54              |
| Mosquito VEM Geminivirus - SDWAP S - AG     | 574 - 2000    | SD-WAP | -                | -             | Geminiviridae                                                    | Plant             | Bean golden mosaic virus (1e-07 - 3e-14)                              | 51 - 69         |
| Mosquito VEM Geminivirus - SDWAP AF         | 593           | SD-WAP | -                | -             | Geminiviridae                                                    | Plant             | Blainvillea yellow spot virus (4e-05)                                 | 50              |
| Mosquito VEM Geminivirus - SDWAP AG         | 451           | SD-WAP | -                | -             | Geminiviridae                                                    | Plant             | Pepper yellow leaf curl Indonesia virus (1e-05)                       | 41              |
| Mosquito VEM Geminivirus - SDWAP AH & AI    | 638 - 1074    | SD-WAP | -                | -             | Geminiviridae                                                    | Plant             | Soybean crinkle leaf virus (9e-11 - 8e-10 )                           | 46              |
| Mosquito VEM Geminivirus - SDWAP AK         | 2150          | SD-WAP | -                | -             | Geminiviridae                                                    | Plant             | Squash leaf curl China virus (0.004)                                  | 59              |
| Mosquito VEM Geminivirus - SDWAP AL         | 561           | SD-WAP | -                | -             | Geminiviridae                                                    | Plant             | Tomato leaf curl Java virus (2e-04)                                   | 50              |
| Mosquito VEM Geminivirus - SDWAP AM -AO     | 530 - 939     | SD-WAP | -                | -             | Geminiviridae                                                    | Plant             | Tomato leaf curl New Delhi virus (2e-07 - 3e-11)                      | 41 - 54         |
