# Supplementary material for: Broad Surveys of DNA Viral Diversity Obtained through Viral Metagenomics of Mosquitoes
Source: PubMed Central journal article supplement (PMC3108952; doi:10.1371/journal.pone.0020579), 2011-06-06
Supplement: pone.0020579.s004.pdf [file pone.0020579.s004.pdf]

Table S3

Analysis of the contigs with amino acid identities (tBLASTx, evalue&lt;0.001) to bacteriophages and insect viruses.

| Most significant matches from Genbank<br>(tBLASTx, evalue < 0.001) | Mosquito SD-BVL virome |                           |                           | Mosquito SD-RB virome |                           |                           | Mosquito SD-WAP virome |                           |                           |
|--------------------------------------------------------------------|------------------------|---------------------------|---------------------------|-----------------------|---------------------------|---------------------------|------------------------|---------------------------|---------------------------|
|                                                                    | Number of<br>Contigs   | Min of % a.a.<br>identity | Max of %<br>a.a. identity | Number of<br>Contigs  | Min of % a.a.<br>identity | Max of %<br>a.a. identity | Number of<br>Contigs   | Min of % a.a.<br>identity | Max of %<br>a.a. identity |
| <b>Invertebrates</b>                                               |                        |                           |                           |                       |                           |                           |                        |                           |                           |
| <i>Iridoviridae</i>                                                |                        |                           |                           |                       |                           |                           |                        |                           |                           |
| Chilo iridescent virus                                             |                        |                           |                           |                       |                           |                           | 4                      | 41                        | 54                        |
| <i>Parvoviridae</i>                                                |                        |                           |                           |                       |                           |                           |                        |                           |                           |
| Aedes aegypti densovirus                                           | 2                      | 63.64                     | 95.24                     | 1                     | 100                       | 100                       | 1                      | 100                       | 100                       |
| Aedes aegypti Thai densovirus                                      | 3                      | 58.33                     | 81.25                     |                       |                           |                           | 1                      | 88.29                     | 88.29                     |
| Aedes albopictus densovirus                                        | 56                     | 43.48                     | 100                       | 203                   | 46.88                     | 100                       | 20                     | 75                        | 100                       |
| Anopheles gambiae densonucleosis virus                             | 1                      | 67.74                     | 67.74                     |                       |                           |                           |                        |                           |                           |
| Culex densovirus 0507JS11                                          |                        |                           |                           | 1                     | 88.24                     | 88.24                     |                        |                           |                           |
| Culex pipiens densovirus                                           | 4                      | 43.9                      | 53.33                     |                       |                           |                           |                        |                           |                           |
| Diatraea saccharalis densovirus                                    | 1                      | 32.59                     | 32.59                     |                       |                           |                           |                        |                           |                           |
| Haemagogus equinus densovirus                                      | 65                     | 44.83                     | 100                       | 84                    | 40.54                     | 100                       | 6                      | 94.94                     | 100                       |
| Mythimna loreyi densovirus                                         | 2                      | 43.75                     | 47.13                     |                       |                           |                           |                        |                           |                           |
| Toxorhynchites splendens parvovirus                                |                        |                           |                           | 1                     | 95.24                     | 95.24                     |                        |                           |                           |
| <i>Poxviridae</i>                                                  |                        |                           |                           |                       |                           |                           |                        |                           |                           |
| Amsacta moorei entomopoxvirus 'L'                                  |                        |                           |                           |                       |                           |                           | 1                      | 44.74                     | 44.74                     |
| <i>unclassified</i>                                                |                        |                           |                           |                       |                           |                           |                        |                           |                           |
| Gryllus bimaculatus nudivirus                                      | 1                      | 40                        | 40                        | 9                     | 33.33                     | 64.86                     |                        |                           |                           |
| Heliothis zea virus 1                                              |                        |                           |                           | 1                     | 40.38                     | 40.38                     |                        |                           |                           |
| Oryctes rhinoceros virus                                           | 50                     | 26.19                     | 66.67                     | 114                   | 25                        | 72.41                     | 12                     | 36.25                     | 66.67                     |
| <b>Bacteria</b>                                                    |                        |                           |                           |                       |                           |                           |                        |                           |                           |
| <i>Myoviridae</i>                                                  |                        |                           |                           |                       |                           |                           |                        |                           |                           |
| Aeromonas phage 31                                                 | 1                      | 48.84                     | 48.84                     |                       |                           |                           |                        |                           |                           |
| Burkholderia phage phiE255                                         | 2                      | 43.24                     | 62.79                     |                       |                           |                           | 1                      | 44.58                     | 44.58                     |
| Campylobacter phage CPt10                                          |                        |                           |                           |                       |                           |                           | 1                      | 62.86                     | 62.86                     |
| Enterobacteria phage RB43                                          | 1                      | 51.28                     | 51.28                     |                       |                           |                           |                        |                           |                           |
| Escherichia phage rv5                                              | 1                      | 50                        | 50                        |                       |                           |                           |                        |                           |                           |
| Haemophilus phage Aaphi23                                          | 1                      | 60.53                     | 60.53                     |                       |                           |                           | 1                      | 70.24                     | 70.24                     |
| Iodobacteriophage phiPLPE                                          |                        |                           |                           |                       |                           |                           | 1                      | 39.29                     | 39.29                     |
| Pseudomonas phage LBL3                                             | 1                      | 32.08                     | 32.08                     |                       |                           |                           |                        |                           |                           |
| Pseudomonas phage phiCTX                                           | 1                      | 58.82                     | 58.82                     |                       |                           |                           |                        |                           |                           |
| Serratia phage KSP20                                               | 2                      | 62.5                      | 72                        |                       |                           |                           |                        |                           |                           |
| Pseudomonas phage SN                                               | 1                      | 70.59                     | 70.59                     |                       |                           |                           |                        |                           |                           |
| Cyanobacteria phage AS-1                                           |                        |                           |                           | 1                     | 89.74                     | 89.74                     |                        |                           |                           |
| <i>Podoviridae</i>                                                 |                        |                           |                           |                       |                           |                           |                        |                           |                           |
| Burkholderia phage Bcep22                                          | 2                      | 50                        | 58                        |                       |                           |                           |                        |                           |                           |
| Burkholderia phage BcepL02                                         | 1                      | 64.71                     | 64.71                     |                       |                           |                           |                        |                           |                           |
| Enterobacteria phage 13a                                           | 3                      | 54.35                     | 83.33                     |                       |                           |                           |                        |                           |                           |
| Enterobacteria phage 285P                                          | 5                      | 47.69                     | 64.44                     |                       |                           |                           |                        |                           |                           |
| Enterobacteria phage BA14                                          | 2                      | 34.78                     | 55.36                     |                       |                           |                           |                        |                           |                           |
| Enterobacteria phage EcoDS1                                        | 6                      | 50                        | 82.76                     |                       |                           |                           |                        |                           |                           |
| Enterobacteria phage epsilon15                                     | 1                      | 70.27                     | 70.27                     |                       |                           |                           |                        |                           |                           |
| Enterobacteria phage K1F                                           | 1                      | 72.73                     | 72.73                     |                       |                           |                           |                        |                           |                           |
| Enterobacteria phage N4                                            |                        |                           |                           |                       |                           |                           | 5                      | 46.43                     | 59.15                     |
| Enterobacteria phage phiV10                                        | 1                      | 41.46                     | 41.46                     |                       |                           |                           |                        |                           |                           |
| Enterobacteria phage T3                                            | 1                      | 43.14                     | 43.14                     |                       |                           |                           |                        |                           |                           |
| Enterobacteria phage T7                                            | 4                      | 44.58                     | 75.76                     |                       |                           |                           |                        |                           |                           |
| Klebsiella phage K11                                               | 2                      | 55.77                     | 85.19                     |                       |                           |                           |                        |                           |                           |
| Klebsiella phage KP32                                              | 6                      | 52.5                      | 61.36                     |                       |                           |                           |                        |                           |                           |
| Kluyvera phage Kvp1                                                | 3                      | 52.94                     | 67.39                     |                       |                           |                           |                        |                           |                           |
| Morganella phage MmP1                                              | 3                      | 52.38                     | 63.33                     |                       |                           |                           |                        |                           |                           |
| Pseudomonas phage F116                                             | 1                      | 70                        | 70                        | 1                     | 80.43                     | 80.43                     |                        |                           |                           |
| Pseudomonas phage gh-1                                             | 1                      | 58                        | 58                        |                       |                           |                           |                        |                           |                           |
| Pseudomonas phage LIT1                                             |                        |                           |                           |                       |                           |                           | 4                      | 36.59                     | 53.49                     |
| Pseudomonas phage LUZ7                                             |                        |                           |                           |                       |                           |                           | 3                      | 45.1                      | 69.16                     |
| Salmonella phage phiSG-JL2                                         | 4                      | 49.18                     | 71.43                     |                       |                           |                           |                        |                           |                           |
| Vibrio phage N4                                                    | 1                      | 44.07                     | 44.07                     |                       |                           |                           |                        |                           |                           |
| Vibrio phage VP2                                                   |                        |                           |                           |                       |                           |                           | 1                      | 31.82                     | 31.82                     |
| Vibriophage VP4                                                    | 2                      | 50                        | 54.05                     |                       |                           |                           |                        |                           |                           |
| Yersinia pestis phage phiA1122                                     | 1                      | 32.79                     | 32.79                     |                       |                           |                           |                        |                           |                           |
| Yersinia phage phiYeO3-12                                          | 2                      | 62.22                     | 70.37                     |                       |                           |                           |                        |                           |                           |
| Yersinia phage Yepe2                                               | 3                      | 50                        | 71.43                     |                       |                           |                           |                        |                           |                           |
| Acyrtosiphon pisum secondary endosymbiont phage 1                  |                        |                           |                           | 15                    | 87.23                     | 100                       |                        |                           |                           |
| Acyrtosiphon pisum secondary endosymbiont phage 2                  |                        |                           |                           | 6                     | 93.02                     | 100                       |                        |                           |                           |
| Enterobacteria phage ST64T                                         |                        |                           |                           | 1                     | 76.67                     | 76.67                     |                        |                           |                           |
| <i>Siphoviridae</i>                                                |                        |                           |                           |                       |                           |                           |                        |                           |                           |
| Burkholderia phage BcepNazgul                                      | 1                      | 47.69                     | 47.69                     |                       |                           |                           |                        |                           |                           |
| Enterobacteria phage ES18                                          | 4                      | 51.35                     | 75.76                     |                       |                           |                           |                        |                           |                           |
| Enterobacteria phage HK97                                          | 1                      | 52.78                     | 52.78                     |                       |                           |                           |                        |                           |                           |
| Enterobacteria phage N15                                           | 2                      | 38.78                     | 57.45                     |                       |                           |                           |                        |                           |                           |
| Enterobacteria phage TLS                                           | 1                      | 53.49                     | 53.49                     |                       |                           |                           |                        |                           |                           |
| Flavobacterium phage 11b                                           |                        |                           |                           |                       |                           |                           | 4                      | 45.33                     | 55.26                     |
| Klebsiella phage phiKO2                                            | 1                      | 85.29                     | 85.29                     |                       |                           |                           |                        |                           |                           |
| Phage phiJL001                                                     |                        |                           |                           |                       |                           |                           | 1                      | 24.19                     | 24.19                     |
| Pseudomonas phage B3                                               | 4                      | 55.1                      | 68.75                     |                       |                           |                           |                        |                           |                           |
| Pseudomonas phage F10                                              | 1                      | 55.17                     | 55.17                     |                       |                           |                           |                        |                           |                           |
| Xanthomonas phage Xop411                                           |                        |                           |                           |                       |                           |                           | 1                      | 43.37                     | 43.37                     |
