# Supplementary material for: Broad Surveys of DNA Viral Diversity Obtained through Viral Metagenomics of Mosquitoes
Source: PubMed Central journal article supplement (PMC3108952; doi:10.1371/journal.pone.0020579), 2011-06-06
Supplement: pone.0020579.s005.pdf [file pone.0020579.s005.pdf]

Table S4

BLASTn analysis of the contigs with nucleotide identities to members of *Papillomaviridae* and *Parvoviridae*.

| Most significant matches from Genbank<br>(BLASTn, evalue < 0.001) | Mosquito SD-BVL virome |                        |                        | Mosquito SD-RB virome |                        |                        | Mosquito SD-WAP virome |                        |                        |
|-------------------------------------------------------------------|------------------------|------------------------|------------------------|-----------------------|------------------------|------------------------|------------------------|------------------------|------------------------|
|                                                                   | Number of<br>Contigs   | Min % n.t.<br>identity | Max % n.t.<br>identity | Number of<br>Contigs  | Min % n.t.<br>identity | Max % n.t.<br>identity | Number of<br>Contigs   | Min % n.t.<br>identity | Max % n.t.<br>identity |
| <b>Animal</b>                                                     |                        |                        |                        |                       |                        |                        |                        |                        |                        |
| <i>Papillomaviridae</i>                                           |                        |                        |                        |                       |                        |                        |                        |                        |                        |
| Human papillomavirus type 112                                     |                        |                        |                        | 3                     | 71                     | 91                     |                        |                        |                        |
| Human papillomavirus type 23                                      |                        |                        |                        | 27                    | 98                     | 100                    |                        |                        |                        |
| <b>Insect</b>                                                     |                        |                        |                        |                       |                        |                        |                        |                        |                        |
| <i>Parvoviridae</i>                                               |                        |                        |                        |                       |                        |                        |                        |                        |                        |
| Aedes aegypti densovirus                                          | 4                      | 97                     | 100                    | 1                     | 94                     | 94                     |                        |                        |                        |
| Aedes aegypti Thai densovirus                                     | 1                      | 95                     | 95                     |                       |                        |                        |                        |                        |                        |
| Aedes albopictus densovirus                                       | 258                    | 87                     | 100                    | 182                   | 85                     | 100                    | 18                     | 90                     | 100                    |
| Culex densovirus 0507JS11                                         | 1                      | 100                    | 100                    |                       |                        |                        |                        |                        |                        |
| Diatraea saccharalis densovirus                                   | 1                      | 94                     | 94                     |                       |                        |                        |                        |                        |                        |
| Haemagogus equinus densovirus                                     | 336                    | 83                     | 100                    | 131                   | 87                     | 100                    | 11                     | 84                     | 100                    |
| Toxorhynchites splendens parvovirus                               | 2                      | 85                     | 90                     | 4                     | 84                     | 89                     |                        |                        |                        |
