# Supplementary material for: Broad Surveys of DNA Viral Diversity Obtained through Viral Metagenomics of Mosquitoes
Source: PubMed Central journal article supplement (PMC3108952; doi:10.1371/journal.pone.0020579), 2011-06-06
Supplement: pone.0020579.s006.pdf [file pone.0020579.s006.pdf]

Table S5. Cross-BLASTn analysis of the mosquito metagenomes. A sequence was considered to be shared by two metagenomes if each sequence was the best BLASTn similarity for the other when the two metagenomes were compared with BLASTn.

| Sample | SD-BVL  | SD-RB   | SD-WAP  |
|--------|---------|---------|---------|
| SD-BVL | 100.00% | 12.00%  | 11.40%  |
| SD-RB  | 12.00%  | 100.00% | 5.21%   |
| SD-WAP | 11.40%  | 5.21%   | 100.00% |
