# Supplementary material for: Broad Surveys of DNA Viral Diversity Obtained through Viral Metagenomics of Mosquitoes
Source: PubMed Central journal article supplement (PMC3108952; doi:10.1371/journal.pone.0020579), 2011-06-06
Supplement: pone.0020579.s008.pdf [file pone.0020579.s008.pdf]

Table S7. Primers used in this study

| <b>Genome/Sequence</b>                      | <b>Primers 5'to3'</b>                             |
|---------------------------------------------|---------------------------------------------------|
| Mosquito VEM Anellovirus - SDBVL A          | GCATACGTACAATACTCCGCC<br>GCAGAAGACTACGACCAGTGG    |
| Mosquito VEM Anellovirus - SDBVL B          | ATCTTAGGCATCTTGCGCCT<br>ATGTTTCGTGCCACCTCCTAG     |
| Mosquito VEM Circovirus - SDBVL C           | AGGAAGAAACGGGCGAAAAC<br>TCTTTACAAGGTTCTAGGTGTGCTC |
| Mosquito VEM Circovirus - SDBVL D           | TGCCACGAGAATTATCCAGA<br>GCTGCCATAAGACATCGTT       |
| Mosquito VEM Circovirus - SDBVL E           | GGTGAGGAAGTCGGTGAGAA<br>ACAATACGTGACGTTCTGCTC     |
| Mosquito VEM Geminivirus - SDBVL F          | GATGGCGTCCCTCAACATC<br>CCTTGGGCGATTGTTTCATT       |
| Mosquito VEM GeminiFungivirus - SDBVL G     | TATGCAGATTGGCACTACCG<br>TGGGTGCCTAATGATCTTGC      |
| Mosquito VEM Anellovirus - SDRB A           | GGTTACTGGTTGACCAGCGA<br>CCAAGGATTTGACCTCTTCAG     |
| Mosquito VEM Anellovirus - SDRB B           | CTTGGTTGCTTGCAGACCA<br>AAGGATTTGATCTTGGACGC       |
| Mosquito VEM CircoNanoGeminivirus - SDRB AJ | AGAGCCTTCACAGTAGCGAA<br>CTTCCCGGGTGCCATATAG       |
| Mosquito VEM Anellovirus - SDWAP B          | AGACCTCCAGGAGCAACAGA<br>ATCTGAGGCTTCCCCATTTT      |
| Mosquito VEM Denguevirus - SDWAP            | TGCGGACAACGGAAGCAACA<br>TGCTGTGGTGATCCAAGTTGGTGT  |
